# Supplementary material for: A Dual-Acting Nitric Oxide Donor and Phosphodiesterase 5 Inhibitor Activates Autophagy in Primary Skin Fibroblasts
Source: MDPI journal article supplement (doi:10.3390/ijms23126860), 2022-06-20
Supplement: s1 [file s1]

# **A Dual-Acting Nitric Oxide Donor and Phosphodiesterase 5 Inhibitor Activates Autophagy in Primary Skin Fibroblasts**

Esther Martínez-Martínez<sup>1</sup>, Paola Atzei<sup>2</sup>, Christine Vionnet<sup>1</sup>, Carole Roubaty<sup>1</sup>, Stephanie Kaeser-Pebernard<sup>1</sup>, Reto Naef<sup>2</sup>, and Jörn Dengjel<sup>1</sup>

<sup>1</sup> Department of Biology, University of Fribourg, 1700 Fribourg, Switzerland

<sup>2</sup> Topadur Pharma AG, Grabenstrasse 11A, 8952 Schlieren, Switzerland

## **Supplementary Figures**

- **Supplementary Figure S1.** PCA of NHK.
- **Supplementary Figure S2.** Complete network analysis of significantly enriched proteins in TOP-N53 treated NHFs.
- **Supplementary Figure S3.** Analysis of mTORC1 signaling pathway and autophagy-related markers.

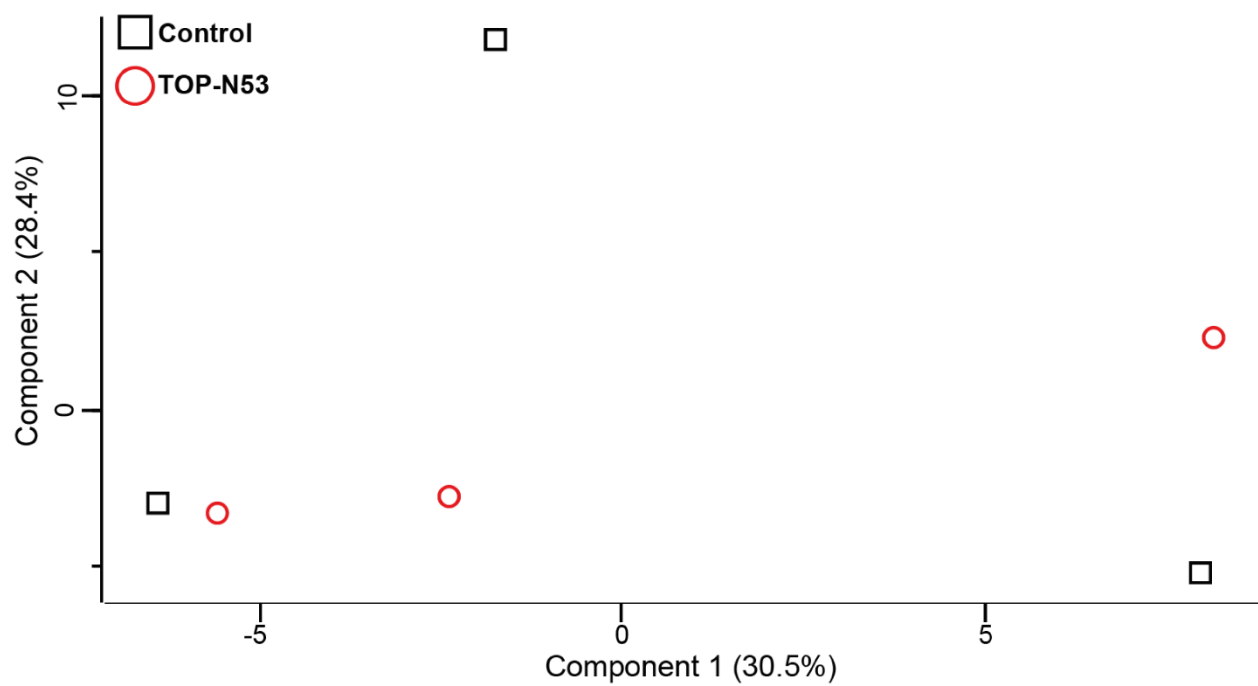

**Supplementary Figure S1. PCA of NHK.** Log<sub>2</sub>-transformed LFQ intensities of identified proteins were used. The two experimental groups (Control and TOP-N53 treatment) do not separate, indicating no global effect of TOP-N53 on the proteome of NHK.

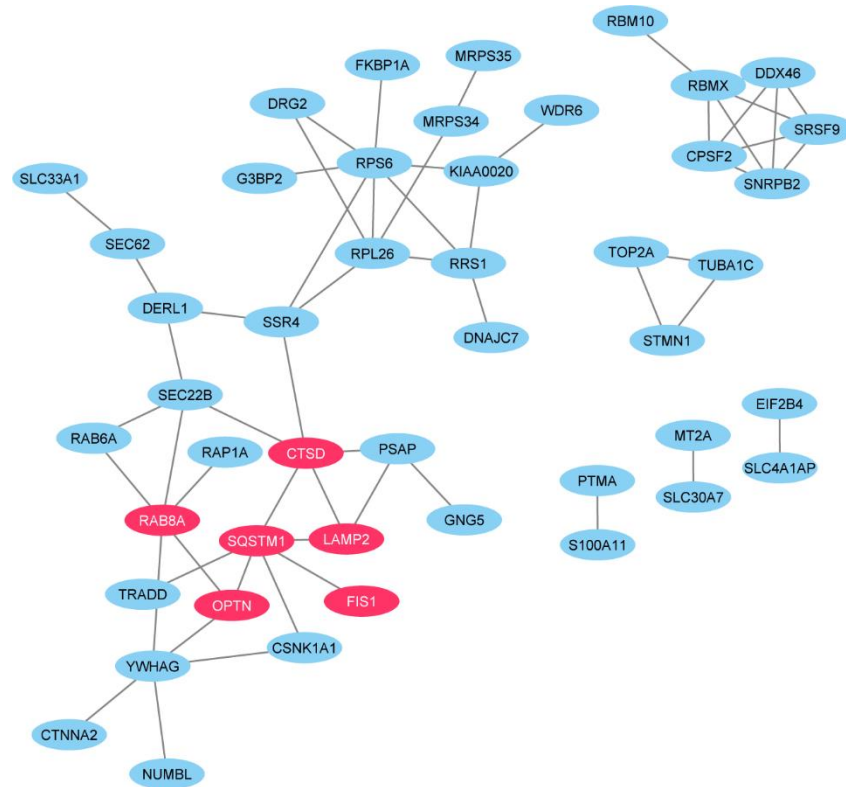

**Supplementary Figure S2. Complete network analysis of significantly enriched proteins in TOP-N53 treated NHFs.** Protein-protein interactions of 63 significantly enriched proteins in TOP-N53 treated NHF as analyzed by STRING DB (FDR < 0.05). Red labeled proteins carry terms “autophagy” (GOBP). Proteins that were not part of a node of at least 2 proteins were not included (n = 48).

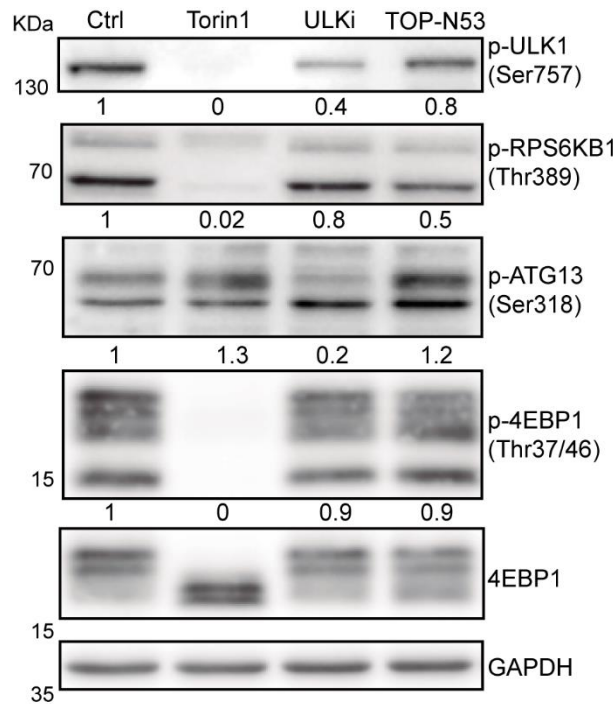

**Supplementary Figure S3. Analysis of mTORC1 signaling pathway and autophagy-related markers.** Analysis of different markers related to mTORC1 signaling and autophagy upon TOP-N53 treatment. NHFs were treated with TOP-N53 (1  $\mu$ M, 24 h), the specific ULK1 inhibitor MRT68921 (1  $\mu$ M, 2 h) and the mTORC1 inhibitor Torin-1 (1  $\mu$ M, 2 h) for comparison of triggered signaling. Representative western blot (n = 2) and its quantification below each protein panel (normalized to GAPDH).
